# Supplementary material for: Suppressive Role of Lactoferrin in Overweight-Related Female Fertility Problems
Source: MDPI journal article supplement (doi:10.3390/nu14050938), 2022-02-22
Supplement: s1 [file s1]

## Supplementary Figure S2

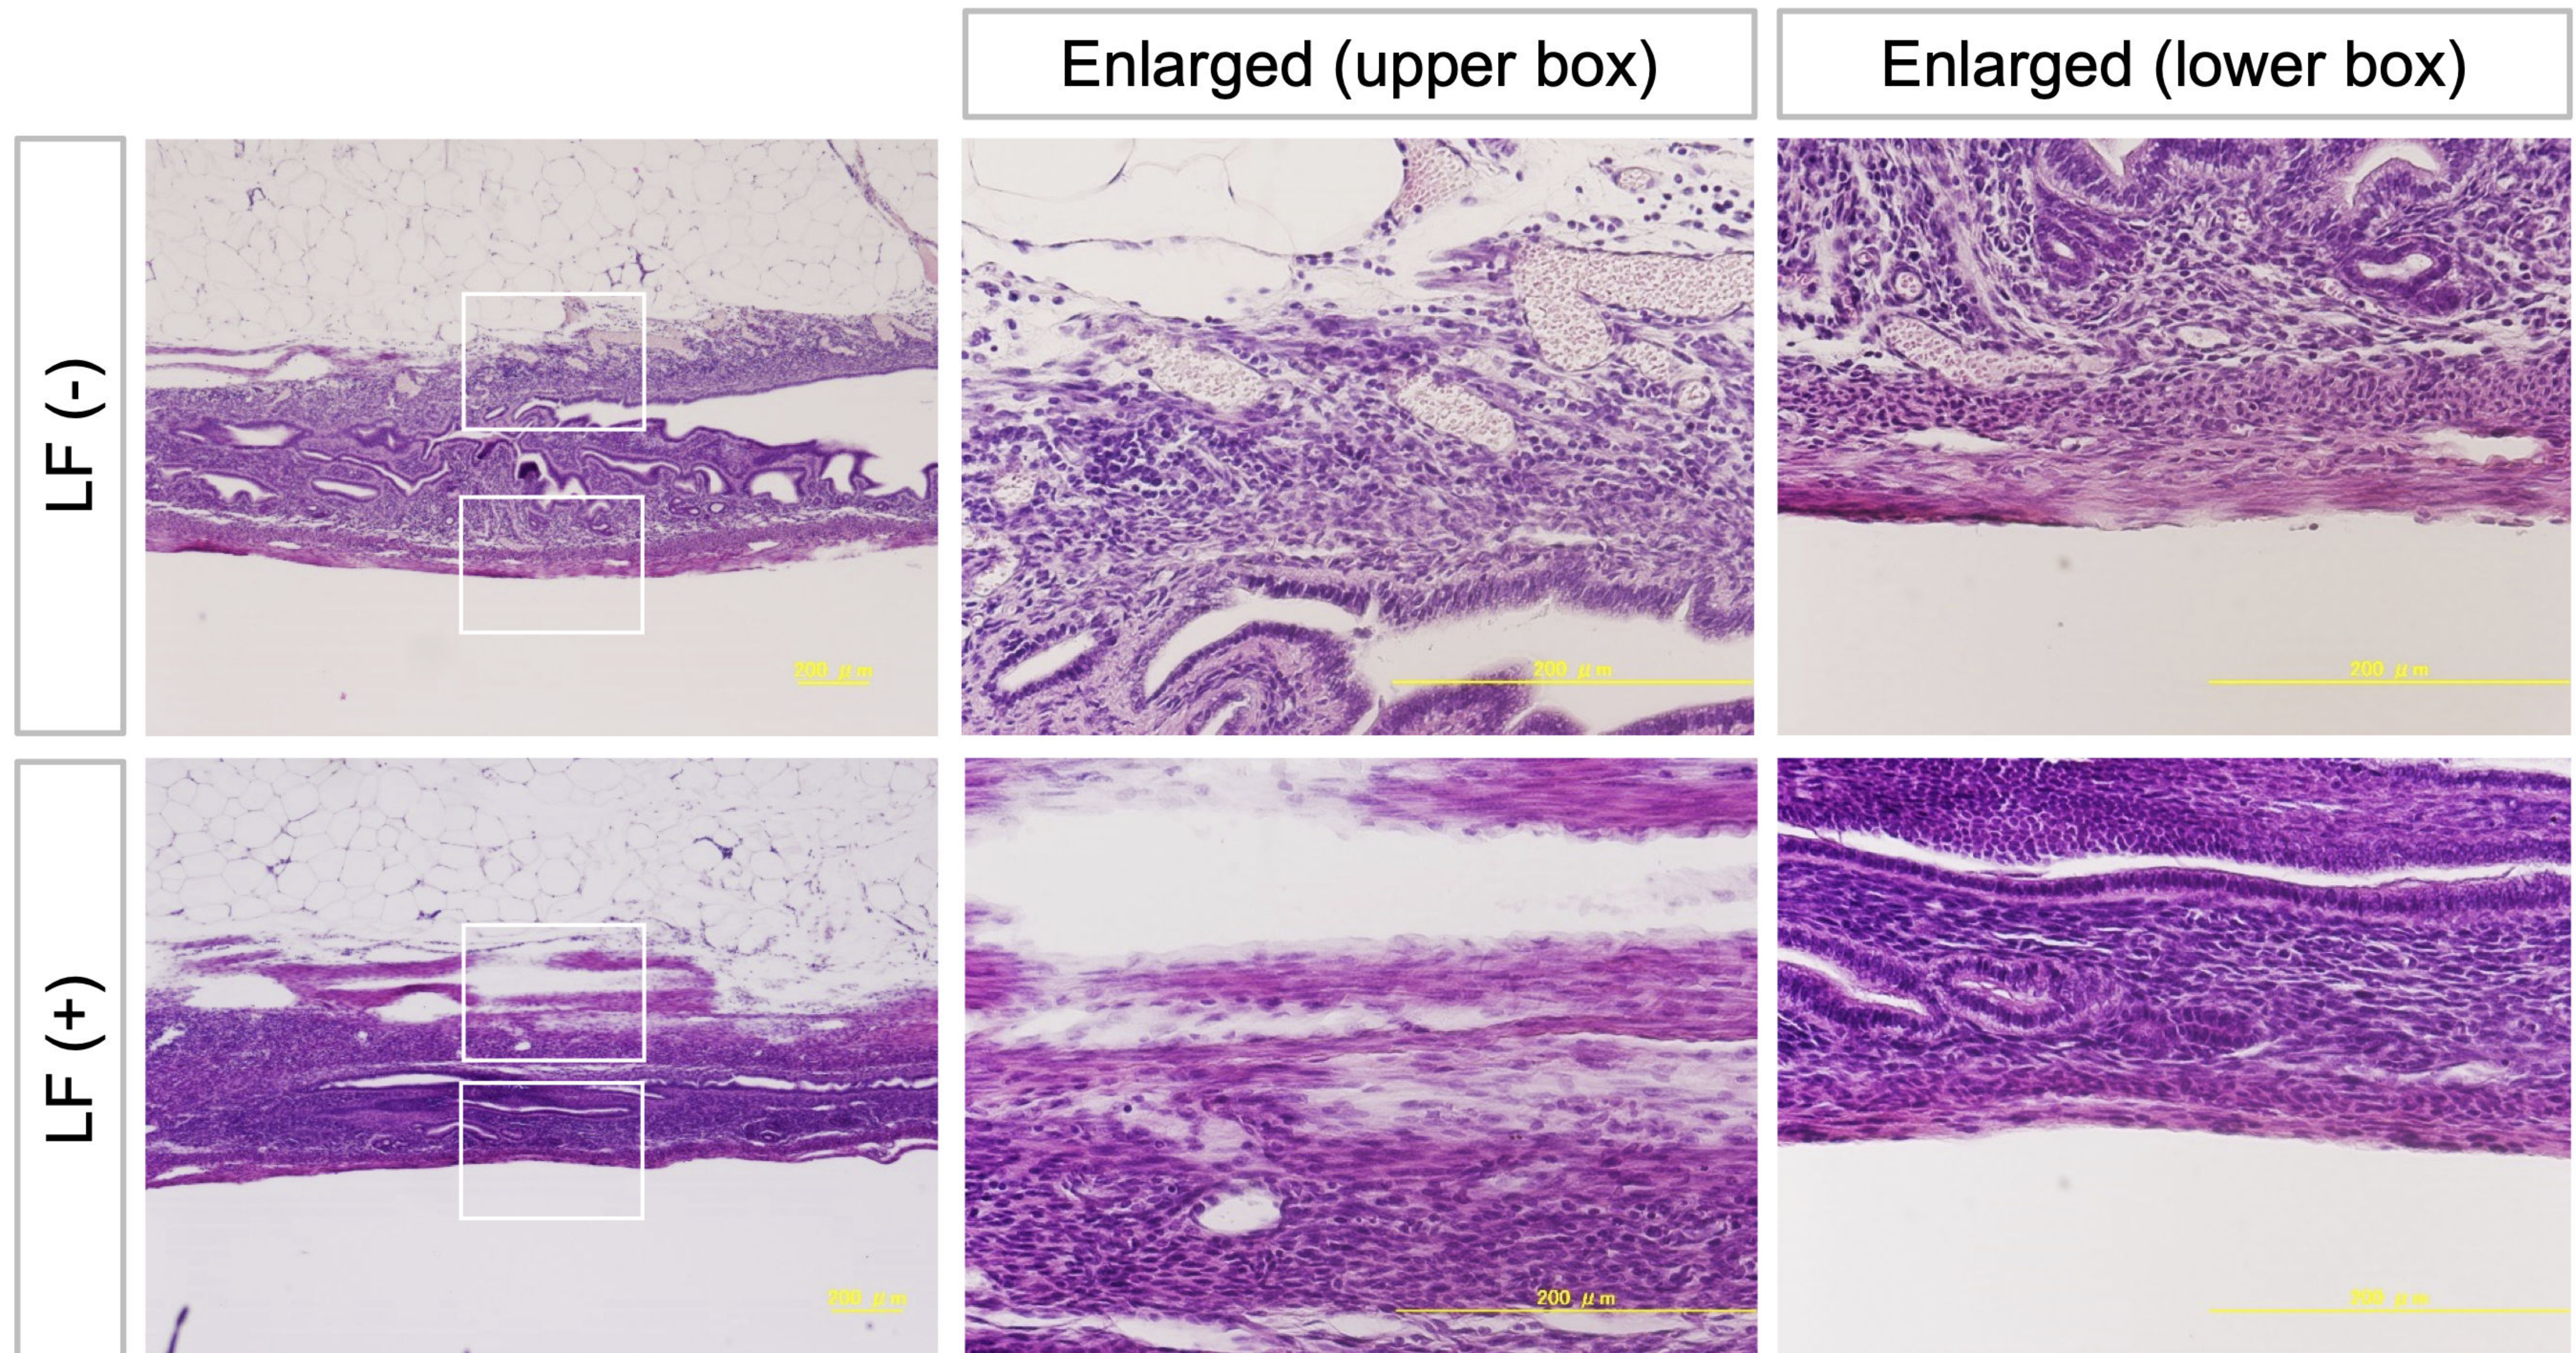

**Supplementary Figure S2.** Histological analysis of uterine tissues in *ob/ob* mice. Boxed regions were enlarged in the middle and right panels. Scale bars, 200  $\mu\text{m}$ .
