# Supplementary material for: Suppressive Role of Lactoferrin in Overweight-Related Female Fertility Problems
Source: MDPI journal article supplement (doi:10.3390/nu14050938), 2022-02-22
Supplement: s1 [file s1]

Supplementary Figure S1

**a**

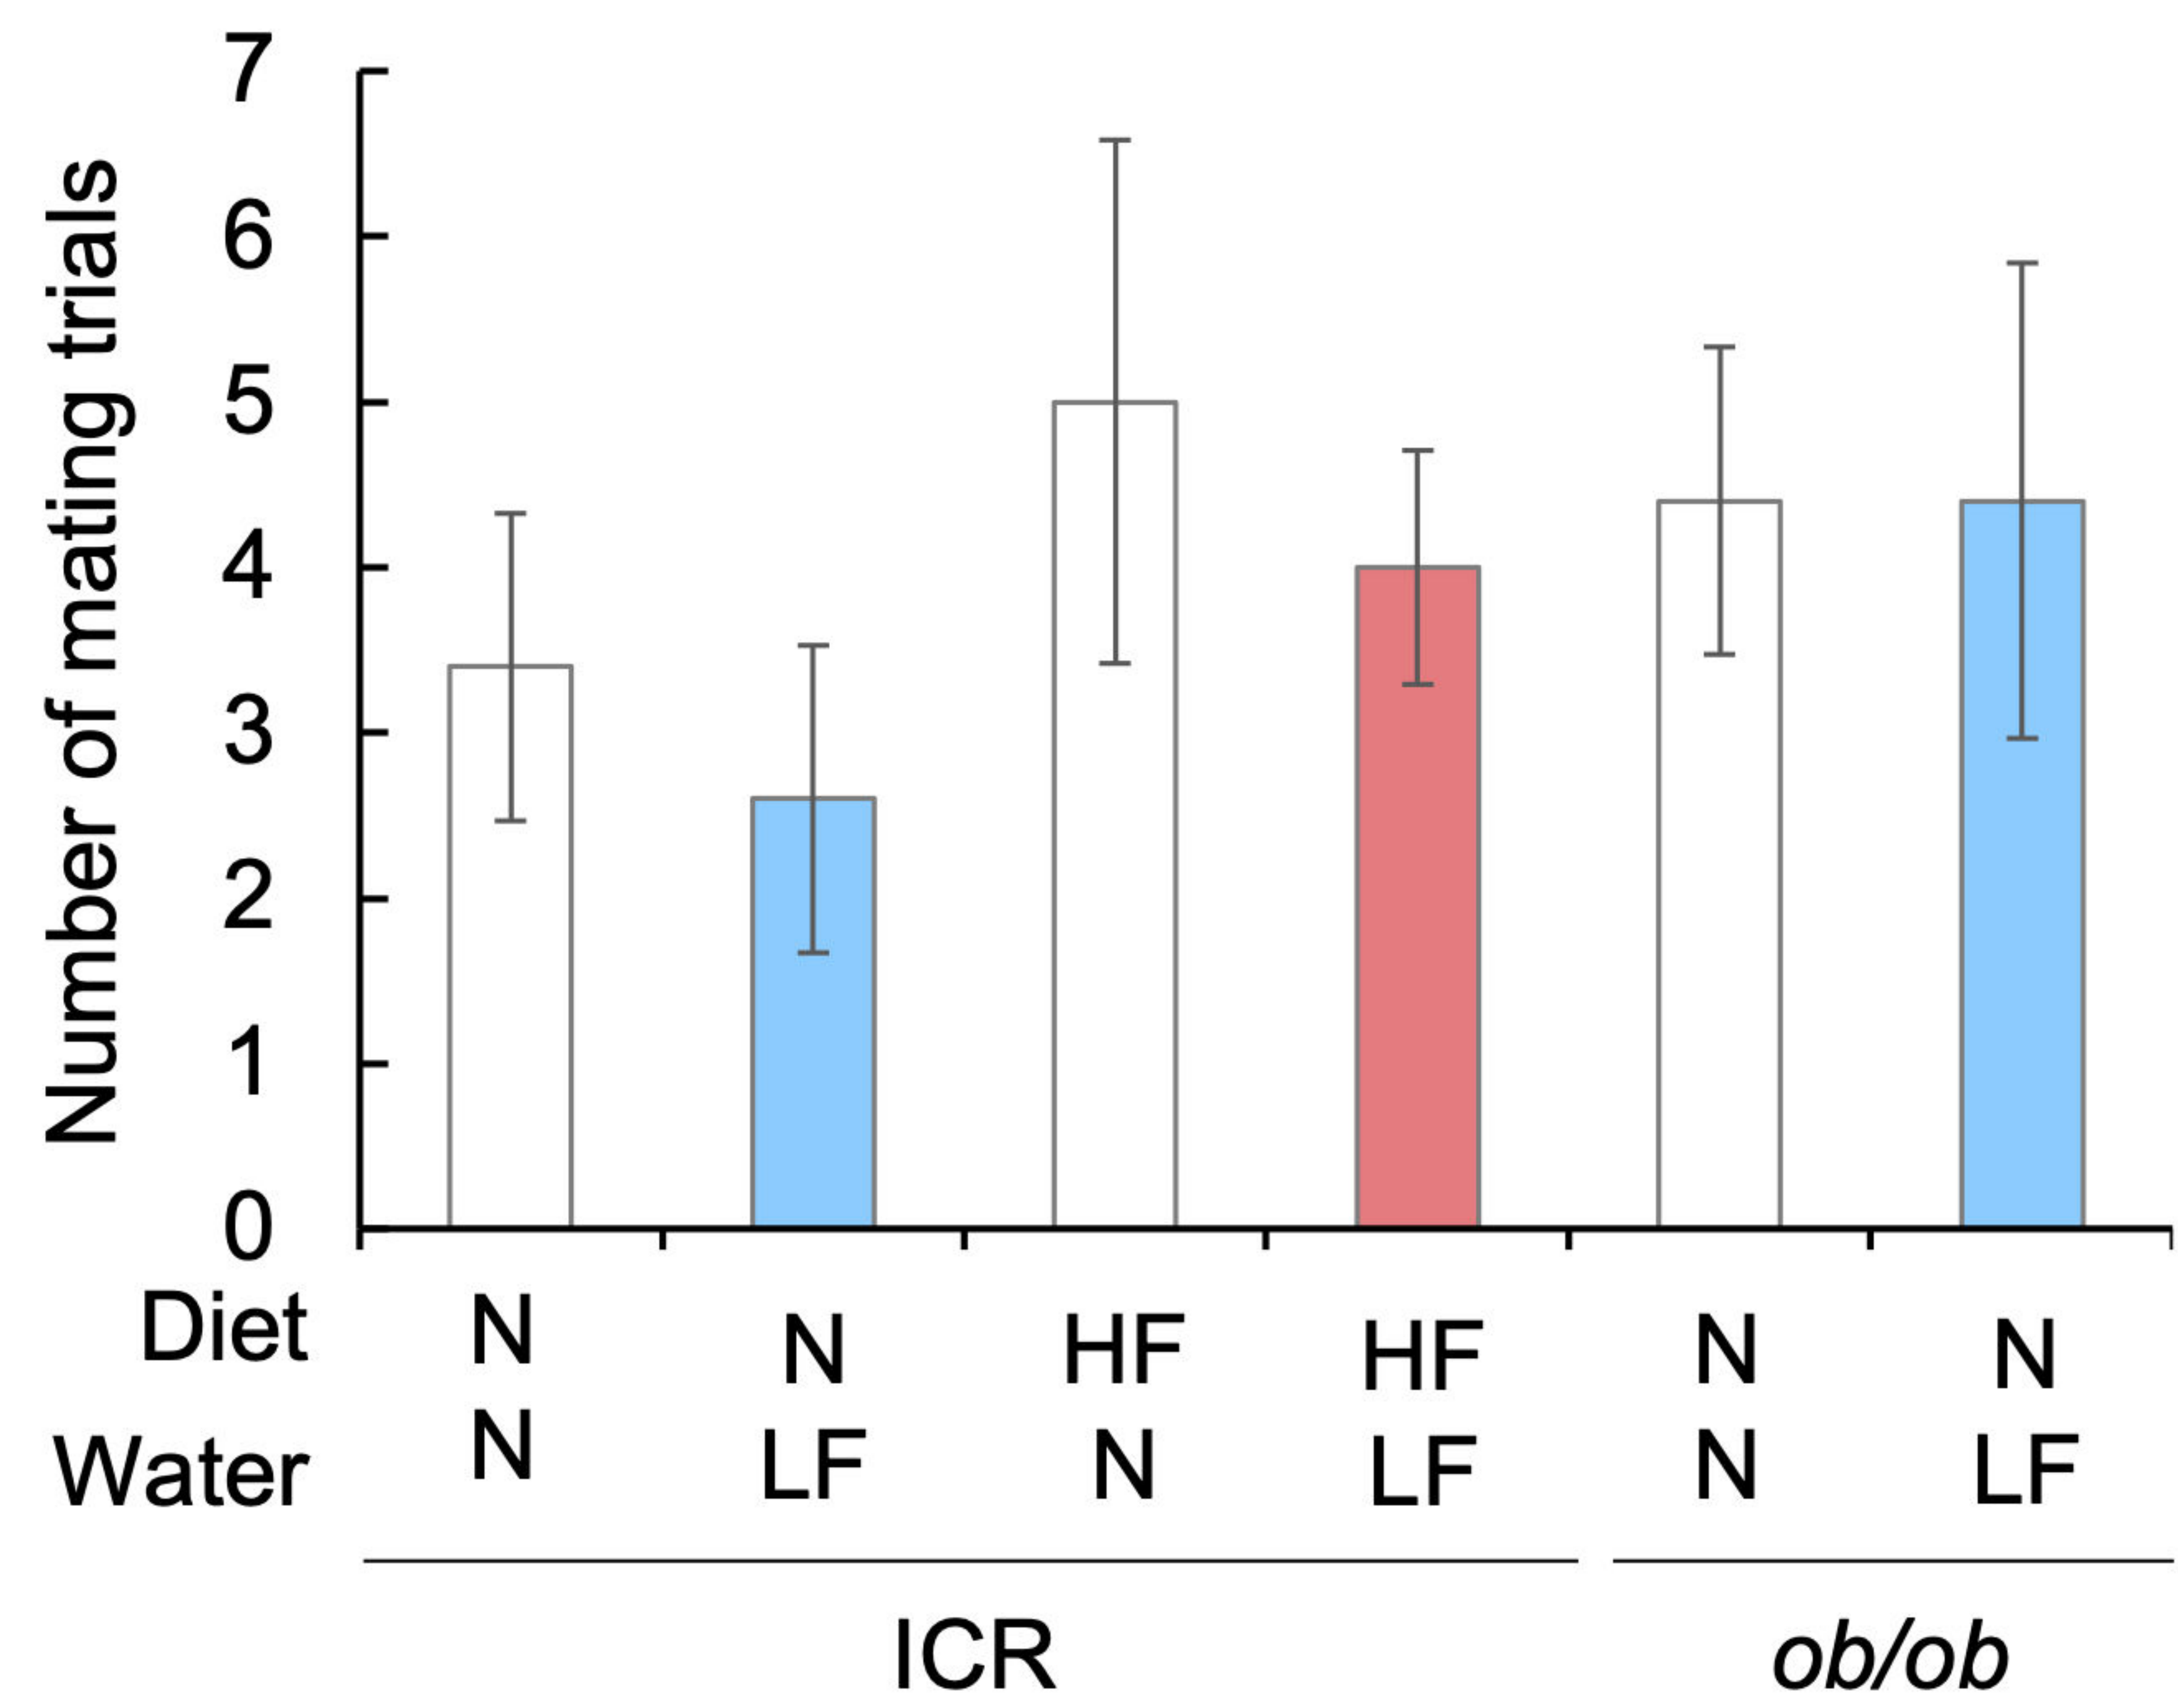

**b**

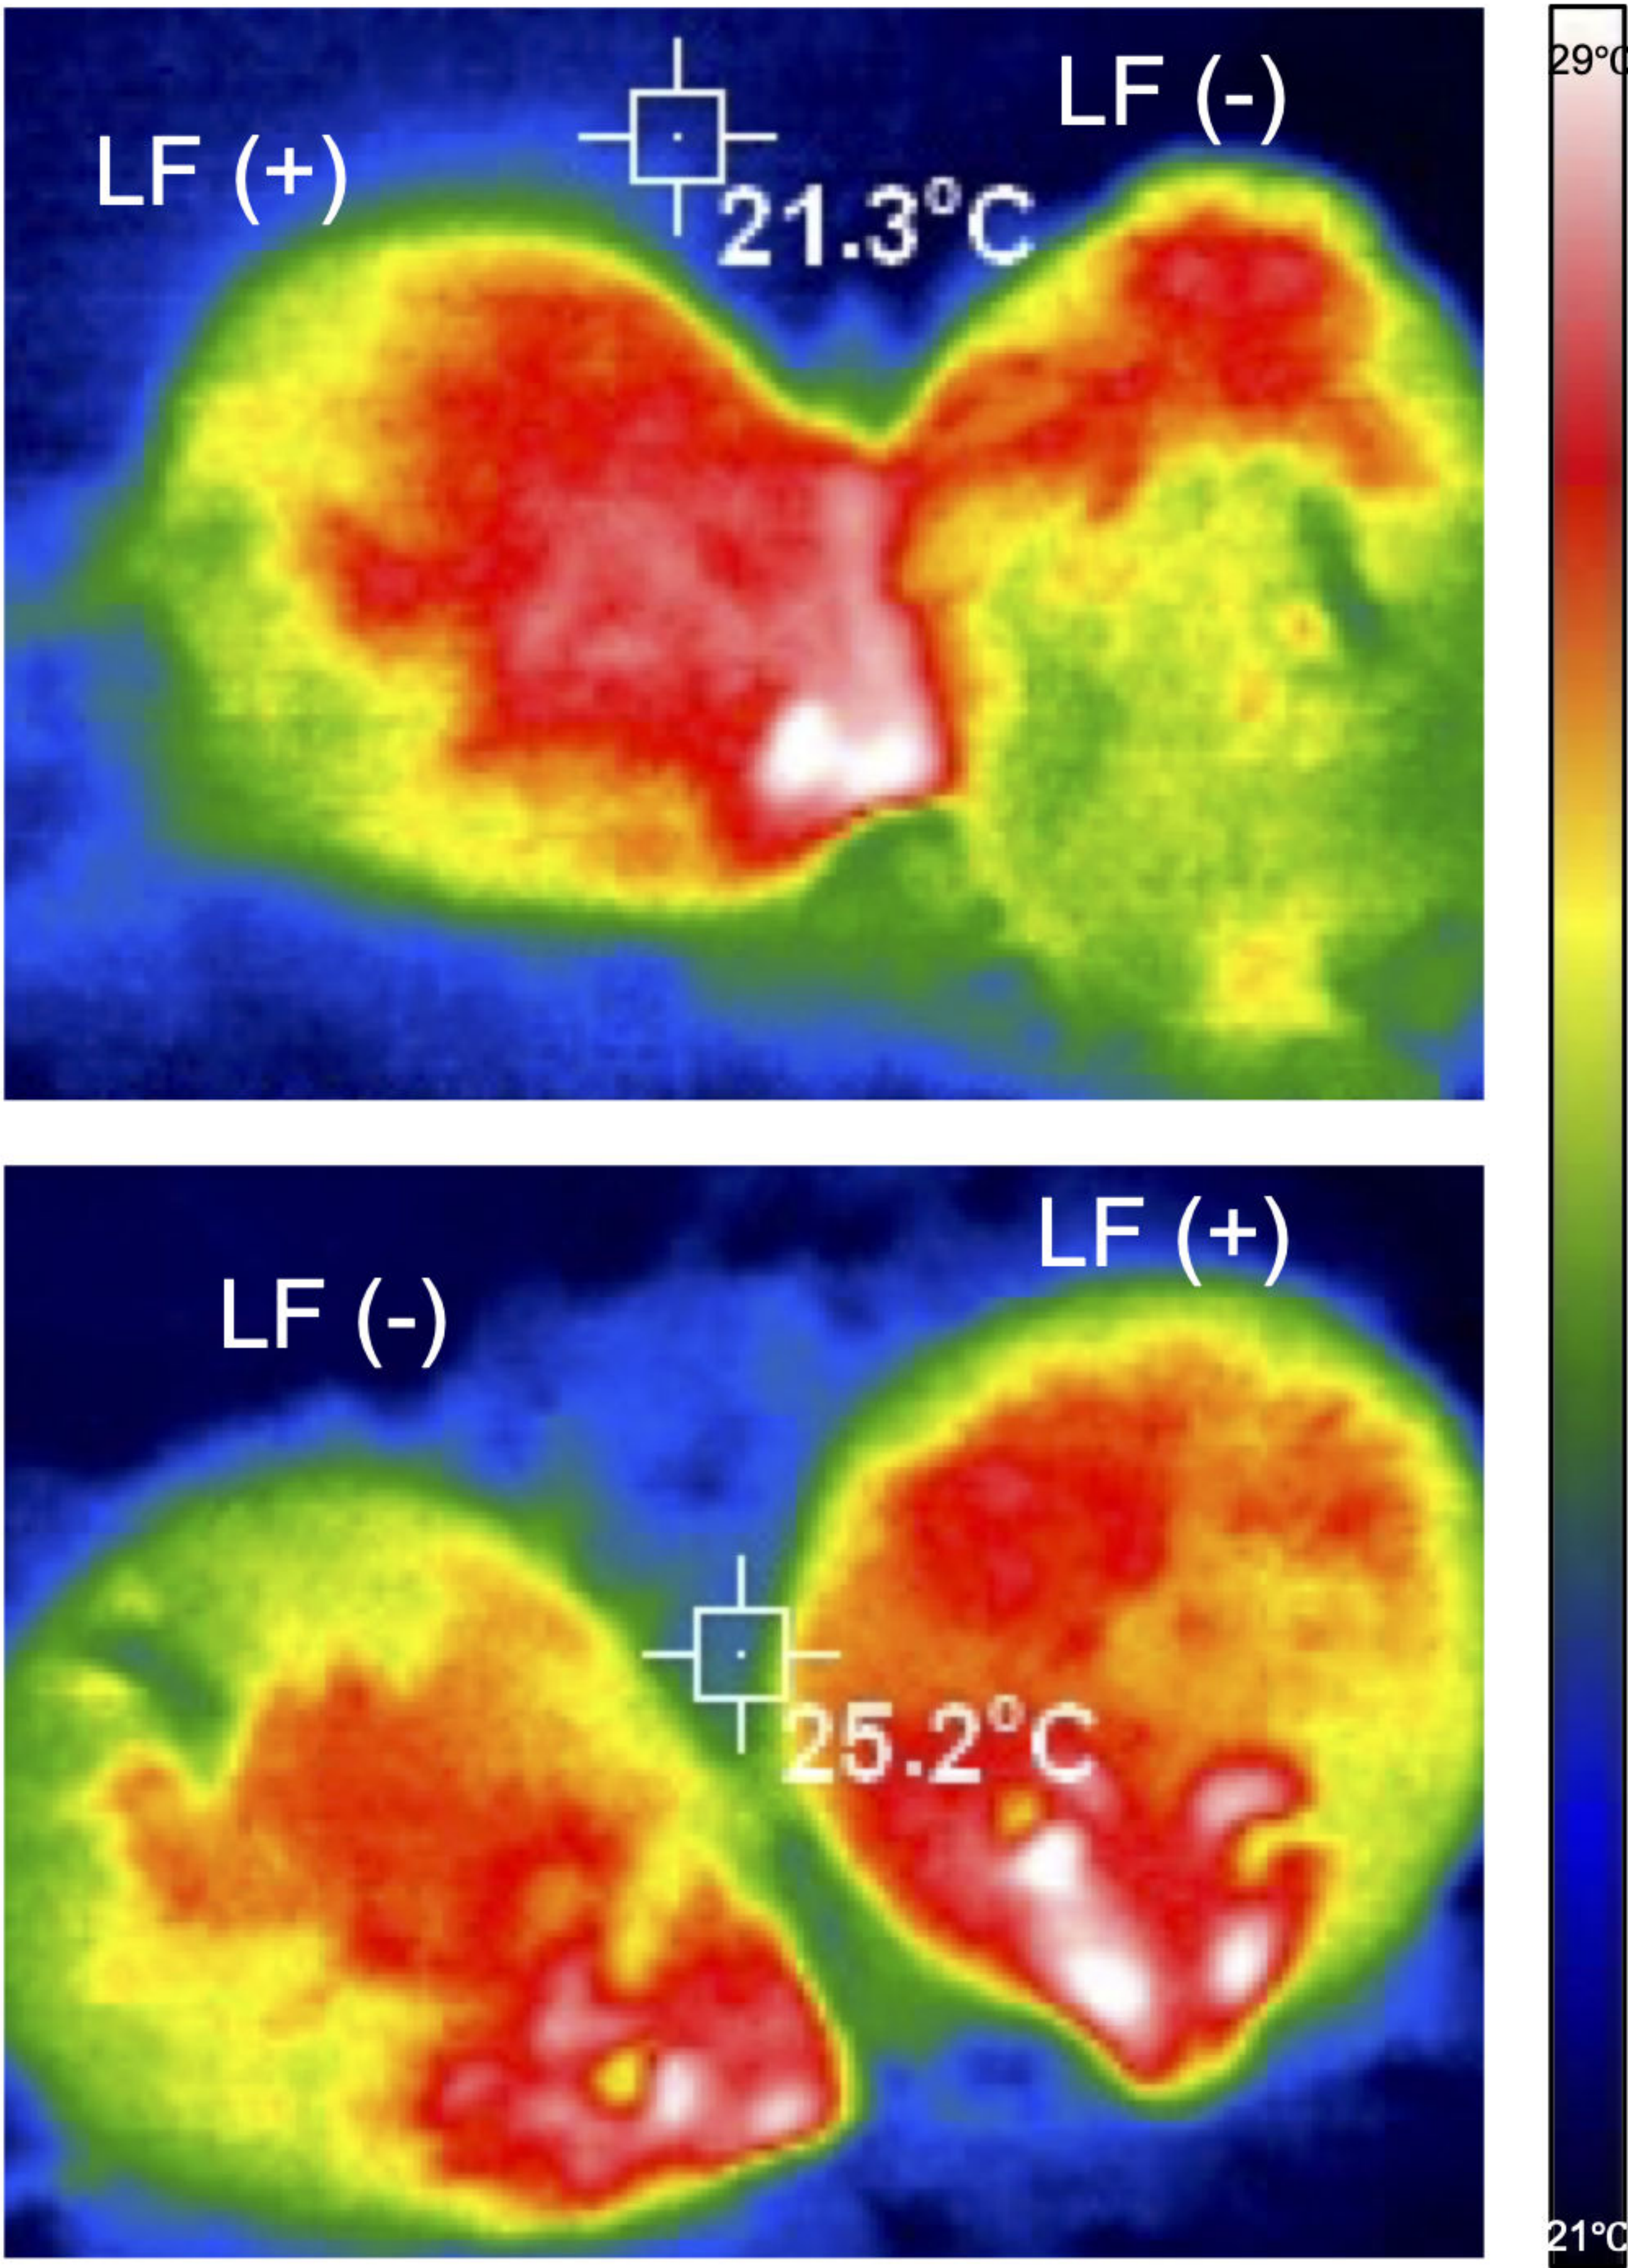

**Supplementary Figure S1.** Effect of LF ingestion in *ob/ob* female mice. (a) The number of mating trials until mating plug was observed (each group: n = 5). (N-N: Normal diets and water; N-LF: Normal diets and water containing LF; HF-N: HF diets and water; HF-LF: HF diets and water containing LF). (b) Thermography
